# Supplementary material for: A small, computationally flexible network produces the phenotypic diversity of song recognition in crickets
Source: eLife journal article supplement (doi:10.7554/elife.61475), 2021-11-04

Figure 1 displays two rows of plots comparing response fields, fitted ellipses, and mismatch for two subjects. The columns are labeled 'response field', 'fitted ellipse', and 'mismatch'. The rows correspond to two subjects. A vertical grayscale bar on the left indicates intensity from 0 (white) to 1 (black). The top-right plot shows a mismatch value of  $S_J = 0.69$ , and the bottom-right plot shows  $S_J = 0.38$ .

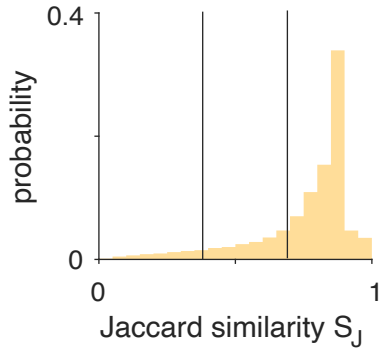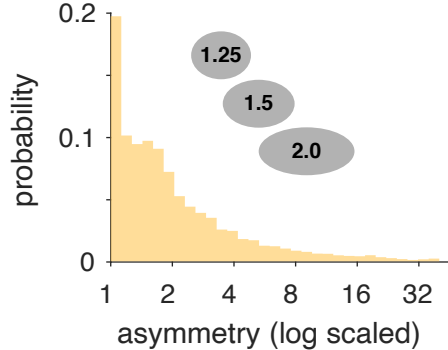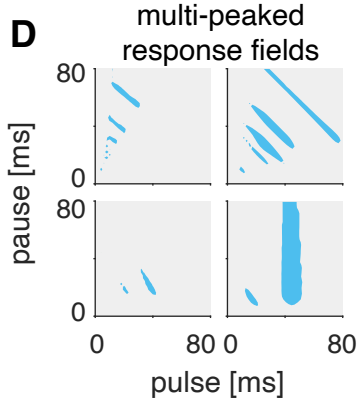

Supplement: supp [file elife-61475-supp-v1.zip]
