# Supplementary figures and images for: A small, computationally flexible network produces the phenotypic diversity of song recognition in crickets
Source: eLife journal article supplement (doi:10.7554/elife.61475), 2021-11-04

fold change  
rebound amp.

**0.5**

**0.66**

**1.00**

**1.50**

**2.00**

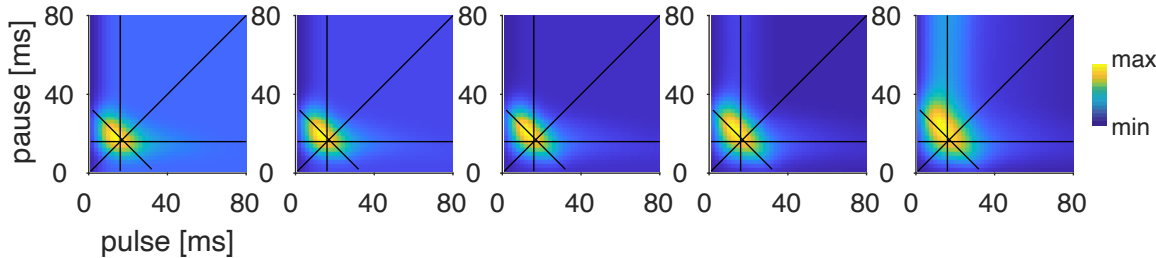

Supplement: supp [file elife-61475-supp-v1.zip]

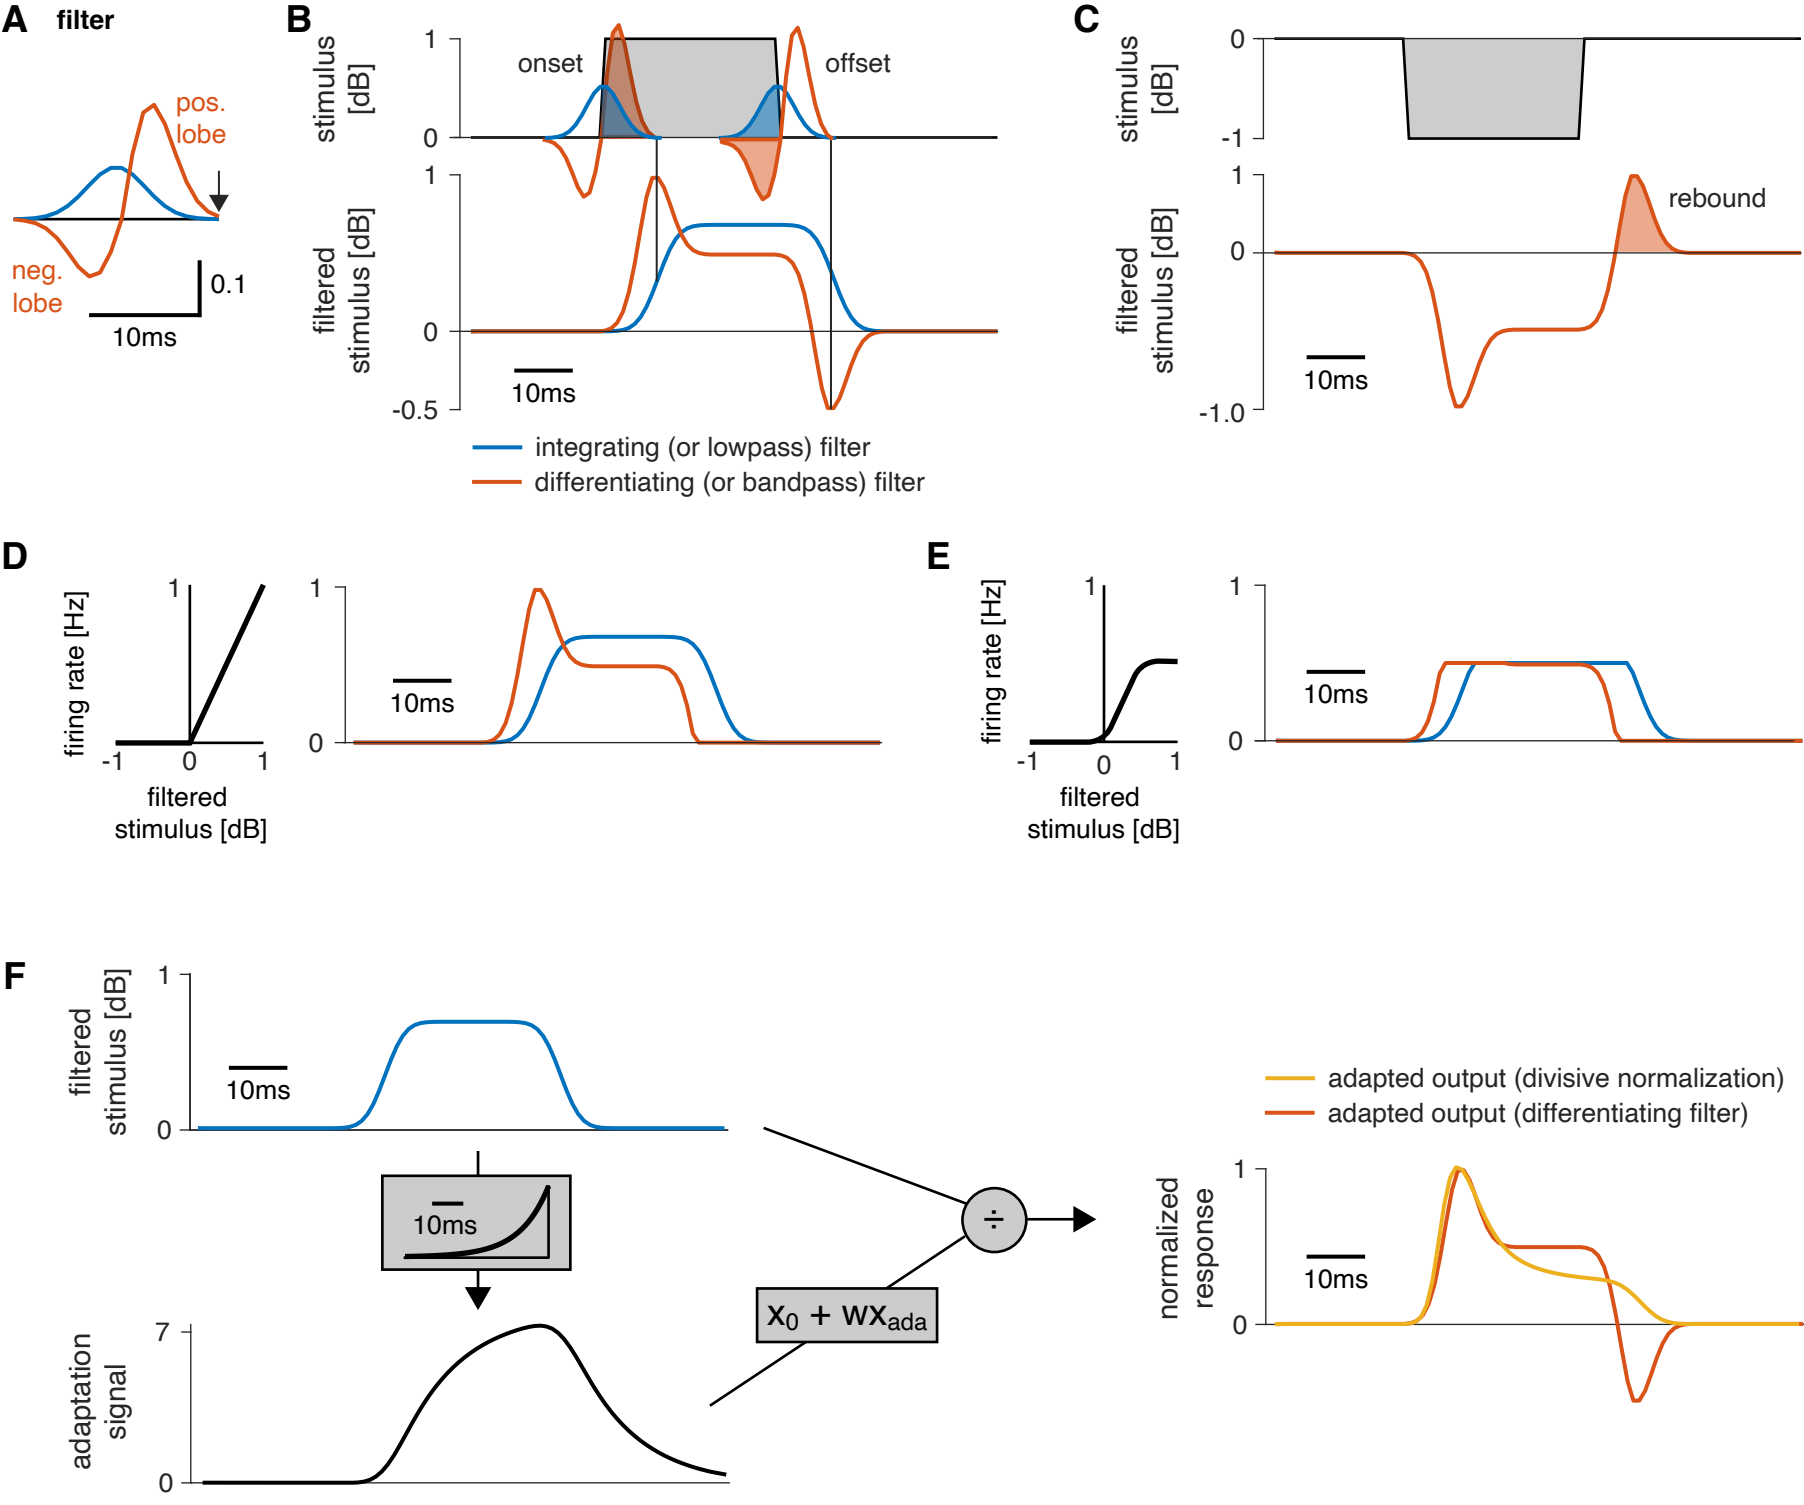

Supplement: supp [file elife-61475-supp-v1.zip]

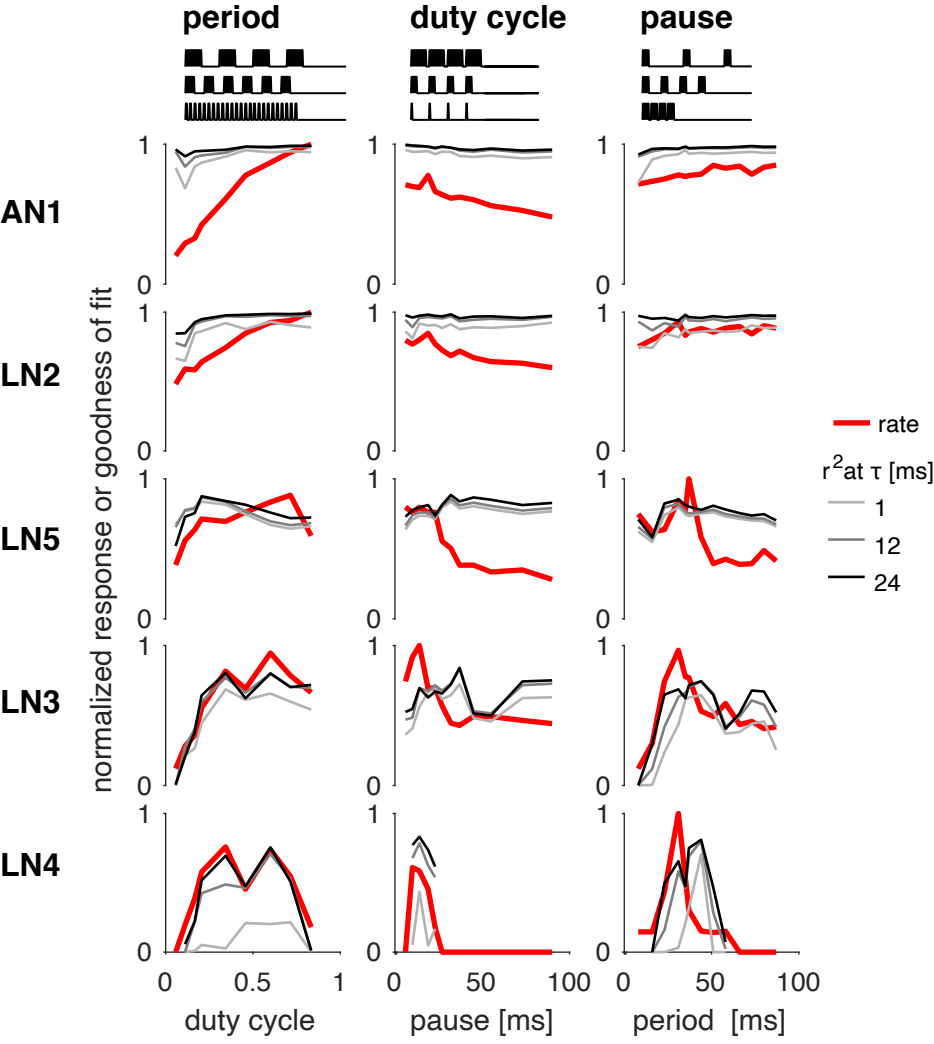

Supplement: supp [file elife-61475-supp-v1.zip]

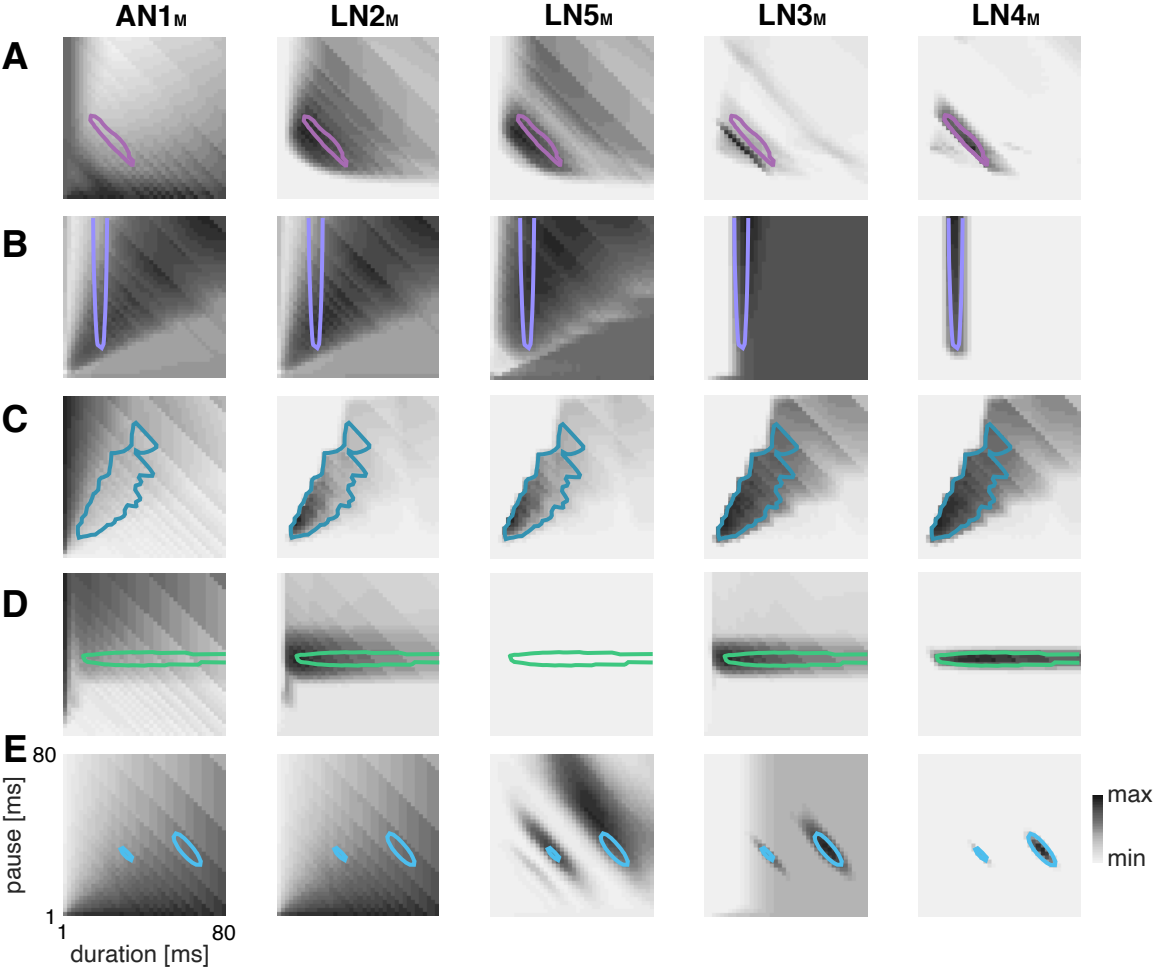

Supplement: supp [file elife-61475-supp-v1.zip]

**A****LN5<sub>M</sub> response**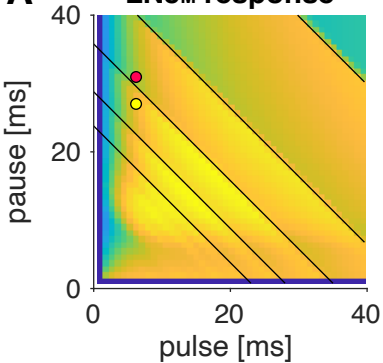**B****number of pulses**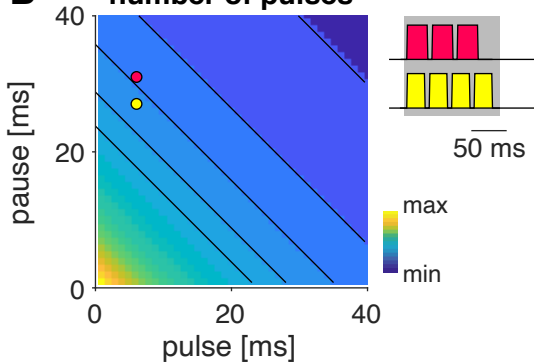

Supplement: supp [file elife-61475-supp-v1.zip]

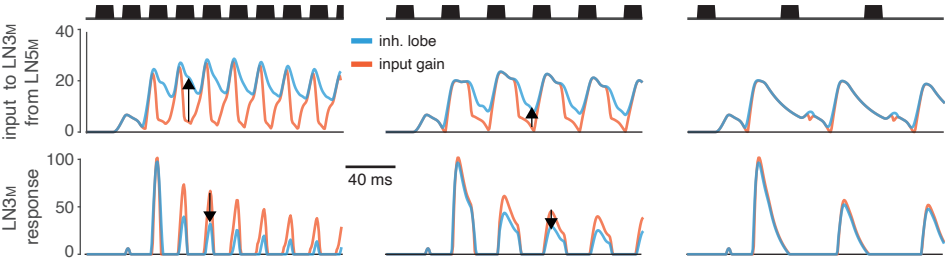

Supplement: supp [file elife-61475-supp-v1.zip]

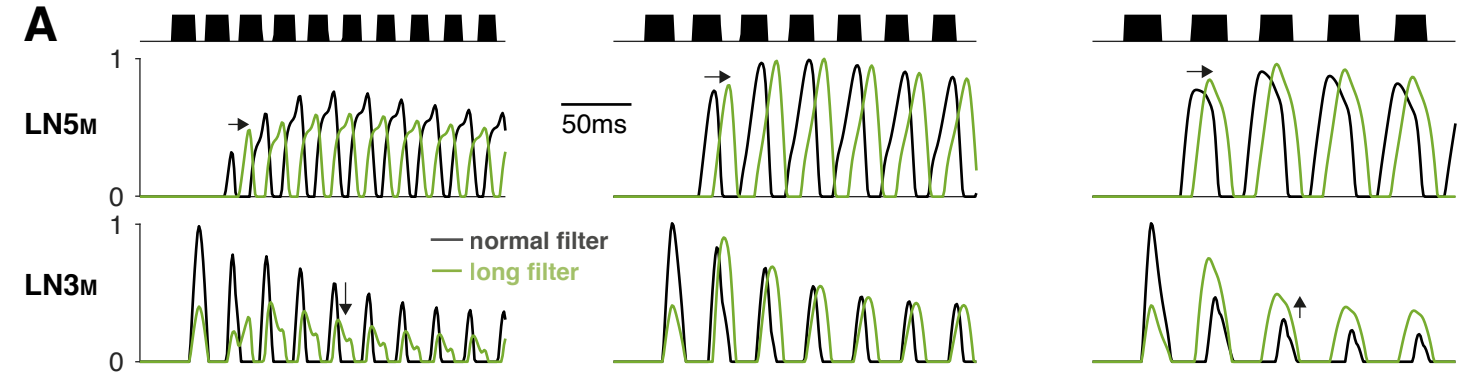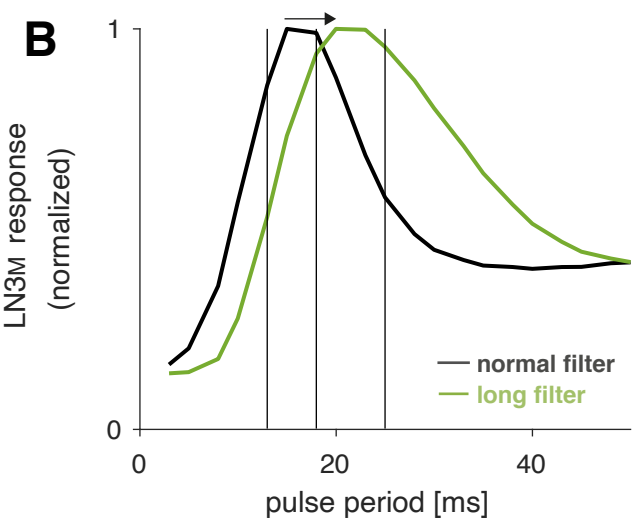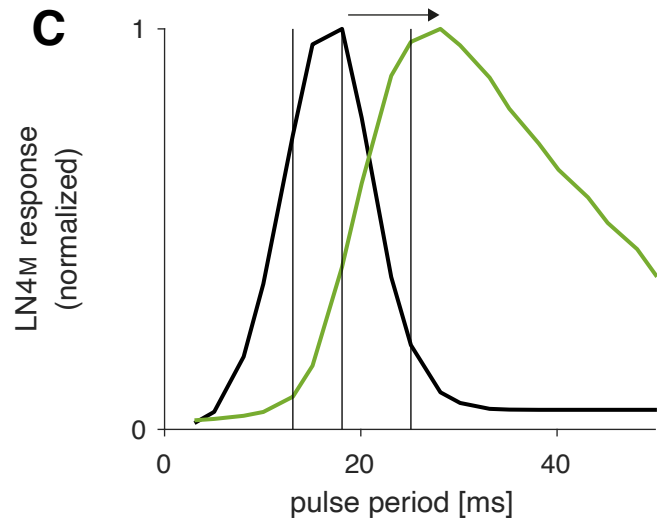

Supplement: supp [file elife-61475-supp-v1.zip]

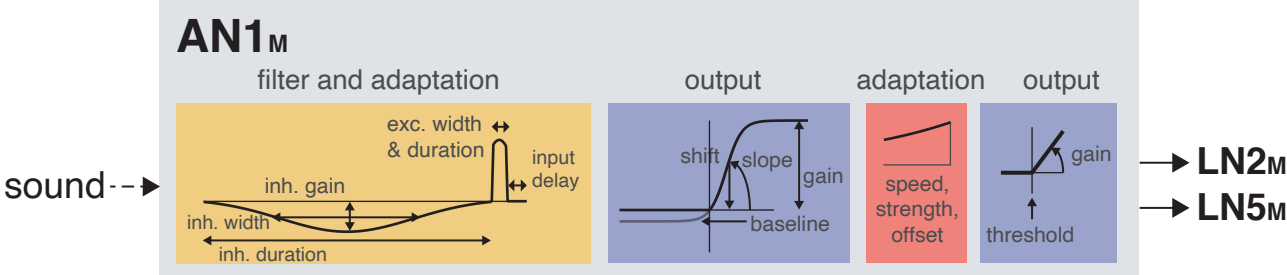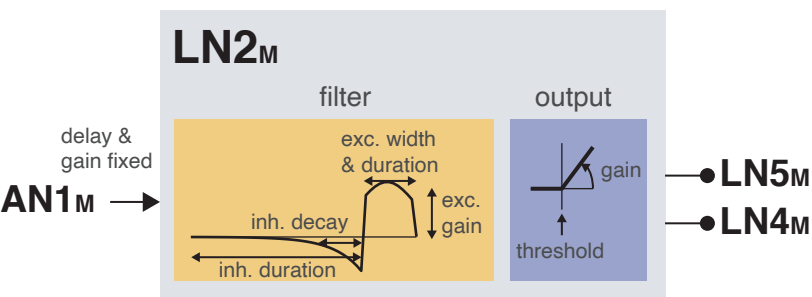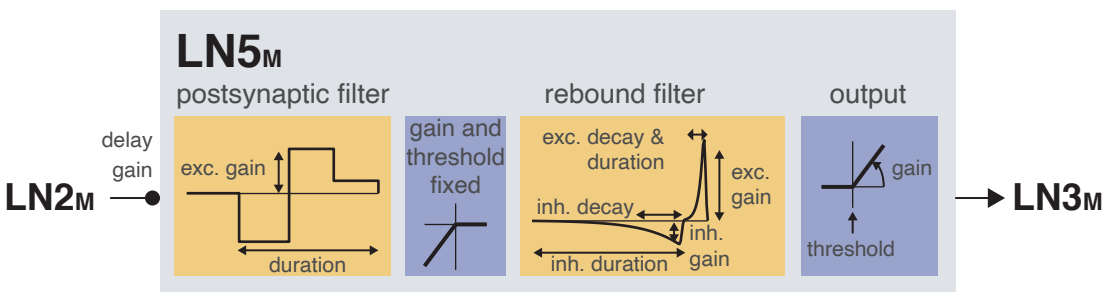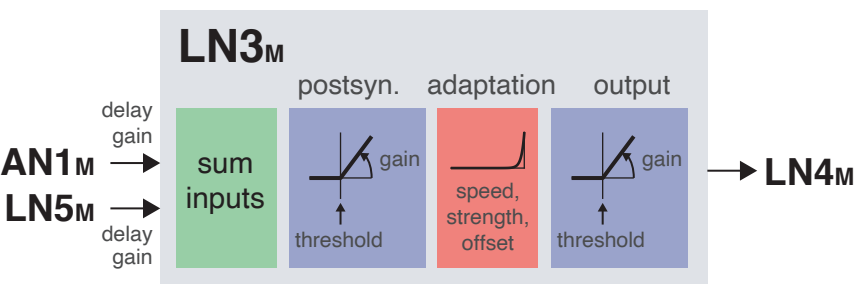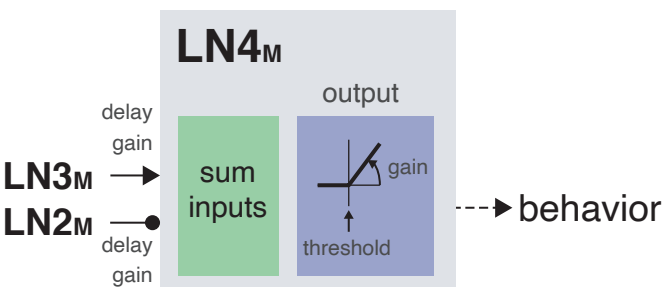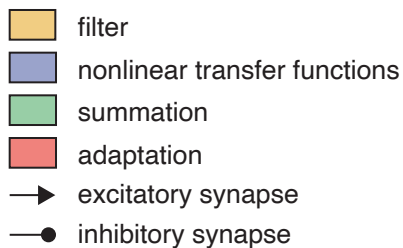

Supplement: supp [file elife-61475-supp-v1.zip]

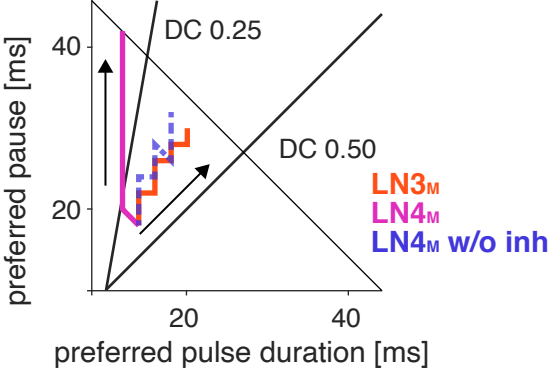

Supplement: supp [file elife-61475-supp-v1.zip]

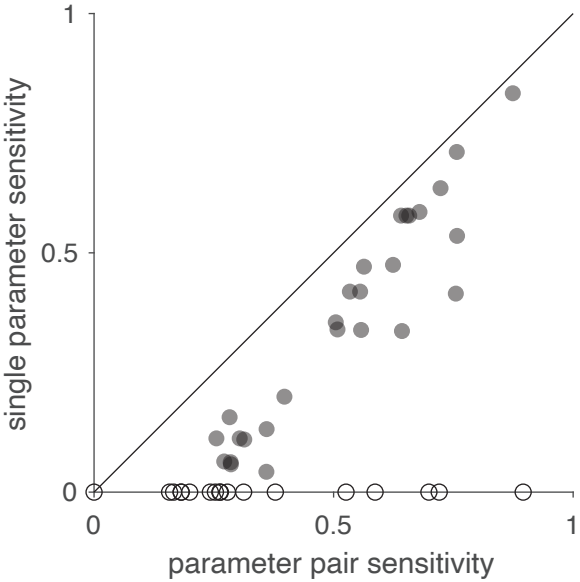

Supplement: supp [file elife-61475-supp-v1.zip]

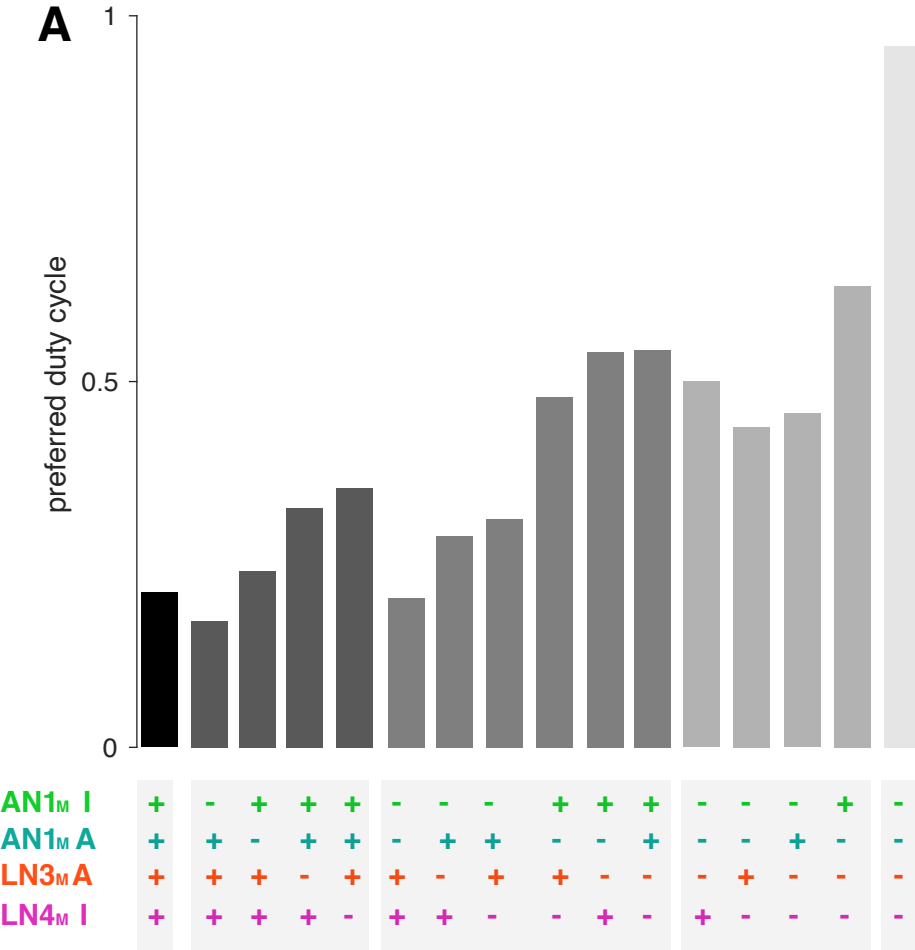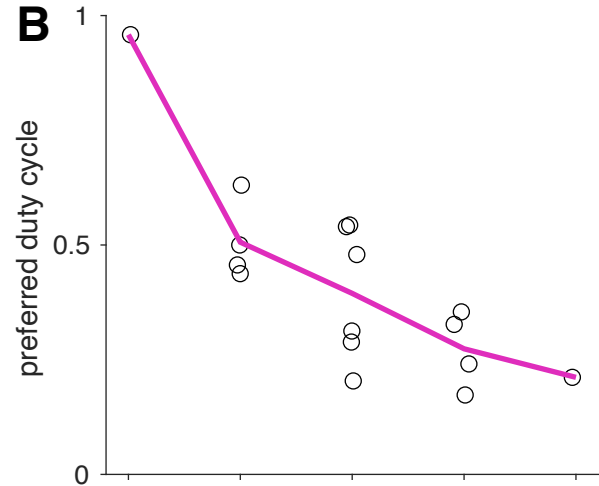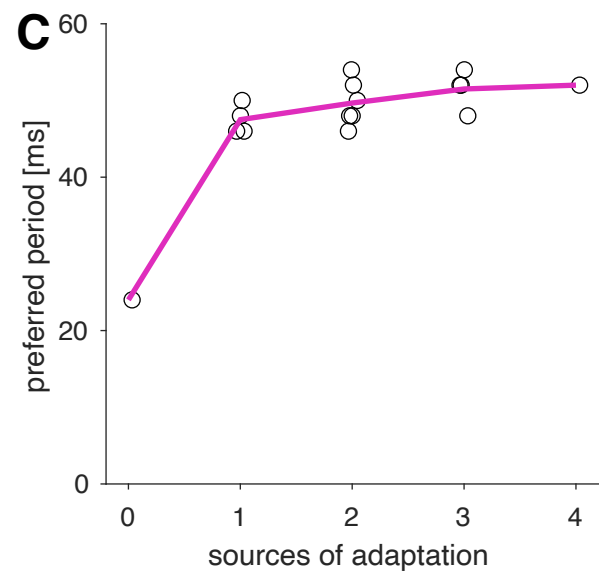

Supplement: supp [file elife-61475-supp-v1.zip]

chirp  
duration

**124 ms**  
**(-1 pulse)**

**140 ms**

**156 ms**  
**(+1 pulse)**

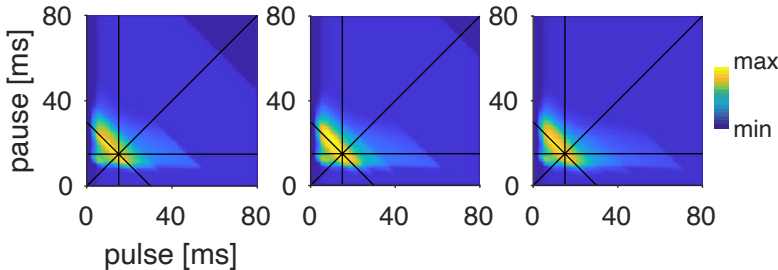

Supplement: supp [file elife-61475-supp-v1.zip]
